# Supplementary material
Source: publisher figshare collection journal article supplement (https://gsajournals.figshare.com/ndownloader/files/14206289)
Supplement: Supplementary file 1 [file 14206289]

## Sheet: Sheet1
Table S1. Results of split-GFP mutant screen.
systematic name	standard name	localization in WT	manual score asi1∆ (>1.4)	asi1∆/ WT	ubc7∆/WT	doa10∆/WT	hrd1∆/WT	pep4∆/WT
YMR119W	ASI1	INM	INM	ND	1.51872	0.989305	1.03743	ND
YBR287W	YBR287W	INM	INCREASE	6.70522	1.73507	ND	0.794776	ND
YGL198W	YIP4	NEGATIVE	INCREASE	4.5625	2.125	2.5	1.125	2.5625
YER056C	FCY2	NEGATIVE	INCREASE	3.65714	2.36429	1.1	1.28571	1.34286
YMR040W	YET2	NEGATIVE	INCREASE	3.625	2.5	3.91667	2.625	1.875
YIL088C	AVT7	INM	INCREASE	3.54348	1.91304	0.956522	0.978261	0.913043
YGR191W	HIP1	INM	INCREASE	3.54118	1.56471	0.988235	0.729412	ND
YNL159C	ASI2	NEGATIVE	INCREASE	3.48209	1.28477	1.42041	1.44574	1.13234
YBR243C	ALG7	NEGATIVE	INCREASE	3.2	ND	ND	ND	ND
YER060W	FCY21	NEGATIVE	INCREASE	3.19444	2.47222	0.972222	0.944444	1.19444
YML123C	PHO84	NEGATIVE	INCREASE	2.66667	5.33333	5.66667	3.83333	4.25
YHR026W	VMA16	INM	INCREASE	2.48549	1.64217	0.98646	0.920696	1.09671
YPL087W	YDC1	INM	INCREASE	2.44133	1.80612	1.53061	1.85459	1.2449
YER011W	TIR1	NEGATIVE*	INCREASE	2.40385	2.0641	1.78205	1.41026	1.3141
YGL226C-A	OST5	NUCLEAR	INCREASE	2.34091	1.57576	1.15909	1.18182	1.56818
YER119C	AVT6	INM	INCREASE	2.33333	2.6	1.26667	1.4	1.8
YNL336W	COS1	INM	INCREASE	2.15766	2.28829	1.37387	1.61261	1.01351
YOL031C	SIL1	NUCLEAR	INCREASE	2.01667	2.11667	1.28333	1.65	1.7037
YLR130C	ZRT2	INM	INCREASE	2	2.55172	1.10345	1.2069	1.68966
YBR207W	FTH1	INM	INCREASE	1.9641	2.02564	1.06667	1.31282	1.06667
YOR011W	AUS1	NEGATIVE	INCREASE	1.95	2.35	1.35	1.325	1.525
YAL022C	FUN26	INM	INCREASE	1.92105	1.32164	1.16667	1.02632	1.20175
YOR327C	SNC2	INM	INCREASE	1.91579	0.968421	ND	1.50526	1.09474
YDR492W	IZH1	NEGATIVE	INCREASE	1.88462	1.65865	1.24519	1.43269	1.57212
YLR036C	YLR036C	INM	INCREASE	1.875	2.4	1.2	1.175	1.025
YOR311C	DGK1	INM	INCREASE	1.83246	ND	ND	ND	1.13089
YGL065C	ALG2	NEGATIVE	INCREASE	1.82609	1.17391	1.23913	1.6087	1.17391
YLR088W	GAA1	INM	INCREASE	1.81111	2.03333	1.33333	1.77778	1.94444
YDR458C	HEH2	INM	INCREASE	1.8	ND	ND	1.35556	1.31111
YPL036W	PMA2	NEGATIVE	INCREASE	1.78571	2.82143	1.25	3.60714	5.14286
YAR033W	MST28	INM	INCREASE	1.77692	1.43846	1.15385	1.18077	1.38846
YML116W	ATR1	INM	INCREASE	1.73684	2.18421	2.07895	1.13158	1.13158
YPL058C	PDR12	INM	INCREASE	1.68657	0.597015	1.07463	0.940299	0.895522
YPR124W	CTR1	NUCLEAR	INCREASE	1.68498	1.68132	1.57509	1.78022	1.77656
YGL255W	ZRT1	INM	INCREASE	1.68471	1.26314	0.901569	1.04392	0.916471
YDR384C	ATO3	INM	INCREASE	1.67143	1.57143	1.2	1.37143	1.57143
YOL101C	IZH4	NEGATIVE	INCREASE	1.64539	1.7234	1.08511	1.60993	1.61702
YCL005W-A	VMA9	INM	INCREASE	1.6383	1.59574	1.29787	0.822695	1.59574
YKL004W	AUR1	INM	INCREASE	1.625	1.53846	1.05769	1.5	1.80769
YCL025C	AGP1	INM	INCREASE	1.60687	1.4084	0.721374	ND	1.22519
YGR121C	MEP1	INM	INCREASE	1.59459	1.47748	0.972973	1.43243	ND
YNL125C	ESBP6	NUCLEAR	INCREASE	1.59251	1.91691	1.38715	1.37277	1.40179
YNL321W	VNX1	NEGATIVE	INCREASE	1.58763	1.53608	1.36082	1.46392	1.23711
YDR072C	IPT1	NEGATIVE	INCREASE	1.57895	1.5	1.26316	1.13158	1.23684
YLR064W	PER33	INM	INCREASE	1.56436	1.80198	1.05941	1.56436	0.960396
YGL054C	ERV14	INM	INCREASE	1.56322	1.06897	1.43103	1.13793	1.55172
YJR012C	YJR012C	NUCLEAR	INCREASE	1.56098	1.26829	1.17073	1.07317	ND
YLR447C	VMA6	INM	INCREASE	1.5605	2.4721	ND	0.981215	1.45483
YOR132W	VPS17	NUCLEAR	INCREASE	1.55787	0.576389	1.55556	1.74769	0.746914
YPR183W	DPM1	INM	INCREASE	1.55479	2.08904	1.38356	1.4589	1.26712
YLR001C	YLR001C	INM	INCREASE	1.52632	2.21053	1.26316	2.10526	2.63158
YDR264C	AKR1	INM	INCREASE	1.525	2.35	1.95	1.6	1.775
YLR214W	FRE1	INM	INCREASE	1.50943	1.4717	1.21698	0.896226	0.981132
YNL323W	LEM3	INM	INCREASE	1.50856	1.63325	1.06357	1.29462	1.16993
YER072W	VTC1	INM	INCREASE	1.50735	1.54248	0.79902	ND	0.852941
YBR147W	RTC2	NEGATIVE	INCREASE	1.5	1.2375	1.3875	1.14375	1.05
YDR090C	YDR090C	INM	INCREASE	1.5	1.88462	1.13462	1.23077	1.05769
YCL038C	ATG22	INM	INCREASE	1.5	1.44231	1.01923	1.44231	1.15385
YKL100C	YPF1	INM	INCREASE	1.48929	1.30327	1.26156	1.43067	1.30101
YGL084C	GUP1	INM	INCREASE	1.48786	1.35099	1.03642	1.06954	1.06954
YPR198W	SGE1	INM	INCREASE	1.47893	1.95402	1.36015	1.36398	1.24138
YMR292W	GOT1	INM	INCREASE	1.46987	1.33898	1.30038	1.28908	1.27401
YAL023C	PMT2	NEGATIVE	INCREASE	1.46853	2.83217	1.87413	5.88811	1.51049
YML019W	OST6	NEGATIVE	INCREASE	1.46512	3.39535	2.37209	1.55814	1.25581
YLL023C	POM33	INM	INCREASE	1.46429	1.77381	0.738095	0.619048	1.19048
YCR105W	ADH7	NEGATIVE	INCREASE	1.44737	1.23684	1.39474	1.39474	1.65789
YGR106C	VOA1	INM	INCREASE	1.44651	1.20306	1.02038	1.07205	ND
YLL055W	YCT1	NEGATIVE	INCREASE	1.425	1.05	0.975	1.275	1.325
YKL077W	PSG1	INM	INCREASE	1.42317	1.26829	1.00281	0.965816	0.949465
YOR044W	IRC23	NUCLEAR	INCREASE	1.41419	2.92906	1.38444	1.19908	1.53089
YPL091W	GLR1	NUCLEAR	INCREASE	1.40821	1.00756	0.967603	0.99784	1.01296
YJL130C	URA2	NUCLEAR	INCREASE	1.40541	0.831081	0.878378	0.777027	1.09459
YPR056W	TFB4	NUCLEAR	INCREASE	1.40496	1.16529	1.19008	1.24793	1.31405
YDL052C	SLC1	INM	INCREASE	1.4	1.23495	0.905825	0.961165	1.01068
YMR256C	COX7	NEGATIVE	INCREASE	1.4	1.1625	1.225	1.275	0.9375
YHR181W	SVP26	INM	INM	1.39286	1.73214	1.16071	1.25	1.375
YER024W	YAT2	NEGATIVE	NEGATIVE	1.38919	ND	1.14595	1.03784	3.56757
YBR187W	GDT1	NEGATIVE	NEGATIVE	1.3871	1.22581	1.35484	1.29032	0.870968
YER044C	ERG28	INM	INM	1.38607	ND	1.13498	1.24093	0.956459
YBR013C	YBR013C	NEGATIVE	NEGATIVE	1.38462	ND	1.20513	0.897436	1.02564
YEL069C	HXT13	NEGATIVE	NEGATIVE	1.38462	1.30769	1.07692	1.30769	1.5
YNL052W	COX5A	NUCLEAR	NUCLEAR	1.38462	1.16346	1.47436	1.10256	1.15064
YNL214W	PEX17	NEGATIVE	NEGATIVE	1.38281	2.01563	1.40625	1.3125	1.66406
YPL045W	VPS16	NEGATIVE	NEGATIVE	1.37952	3.48795	1.04819	1.12651	0.89759
YML104C	MDM1	NEGATIVE	NEGATIVE	1.37838	1.54054	0.891892	1.02703	2.81081
YJL200C	ACO2	NEGATIVE	NEGATIVE	1.37634	1.03226	1.56989	0.913978	1.1828
YHR027C	RPN1	NEGATIVE	NEGATIVE	1.375	1.79167	2.08333	1.33333	1.54167
YDR202C	RAV2	NEGATIVE	NEGATIVE	1.37363	1.36264	1.24176	1.05495	1.37912
YOR219C	STE13	NEGATIVE	NEGATIVE	1.37278	1.20118	1.42604	1.33728	1.50888
YDR434W	GPI17	INM	INM	1.37245	1.47959	1.28061	1.56122	1.2551
YHL016C	DUR3	NEGATIVE	NEGATIVE	1.36585	2.2439	1.09756	1.17073	1.19512
YDL204W	RTN2	NEGATIVE	NEGATIVE	1.36585	1.68902	ND	1.45732	1.67073
YPL246C	RBD2	INM	INM	1.36538	1.55769	1.19231	2.21154	1.5641
YPR156C	TPO3	INM	INM	1.36082	1.19702	1.00458	1.01031	1.0756
YJL178C	ATG27	INM	INM	1.35922	1.37864	1.23301	0.84466	1.14563
YBR085W	AAC3	NEGATIVE	NEGATIVE	1.35758	1.10909	1.81818	0.927273	0.727273
YPL060W	MFM1	NEGATIVE	NEGATIVE	1.35714	0.27381	ND	0.412698	0.404762
YNL277W	MET2	NUCLEAR	NUCLEAR	1.35174	1.49128	1.62209	1.13372	1.05523
YGR014W	MSB2	NEGATIVE	NEGATIVE	1.35	1.375	0.975	0.95	1.15
YJL093C	TOK1	NEGATIVE	NEGATIVE	1.34783	1.21739	1.18841	1.36232	1.72464
YOR002W	ALG6	INM	INM	1.34444	1.81111	0.955556	1.38889	1.17778
YNL037C	IDH1	NEGATIVE	NEGATIVE	1.33696	1.97283	1.63043	1.40217	2.05435
YDL212W	SHR3	INM	INM	1.33516	1.25275	1.06044	1.0989	1.15385
YIL047C	SYG1	INM	INM	1.33333	1.17778	1.71111	1.33333	1.15556
YGL212W	VAM7	NUCLEAR	NUCLEAR	1.32762	ND	1.36021	1.20983	1.27101
YNL188W	KAR1	NEGATIVE	NEGATIVE	1.32353	1.74265	1.69853	1.23529	1.01471
YAL002W	VPS8	NUCLEAR	NUCLEAR	1.32222	1.16111	1.58333	1.18889	1.30556
YOR384W	FRE5	NEGATIVE	NEGATIVE	1.32075	1.43396	1.37736	0.886792	1.96226
YGR174C	CBP4	NEGATIVE	NEGATIVE	1.31818	0.863636	0.772727	1.09091	ND
YLR330W	CHS5	NEGATIVE	NEGATIVE	1.31707	ND	1.35366	2.31098	1.87195
YLR443W	ECM7	NEGATIVE	NEGATIVE	1.31561	1.4186	1.41196	0.960133	1.3887
YPL279C	FEX2	NEGATIVE	NEGATIVE	1.3125	3.4375	1.375	1.75	1.8125
YDR393W	SHE9	NEGATIVE	NEGATIVE	1.30952	2.66667	1.57143	2.69048	ND
YBR148W	YSW1	NUCLEAR	NUCLEAR	1.30833	1.31667	1.19583	1.35417	1.33333
YOL064C	MET22	NUCLEAR	NUCLEAR	1.30789	1.33038	1.12316	1.45686	1.15118
YDR105C	TMS1	INM	INM	1.30435	1.32609	1.08696	1.27174	1.55435
YLR404W	SEI1	INM	INM	1.30357	1.5	3.51786	1.94643	1.375
YFL042C	LAM5	NEGATIVE	NEGATIVE	1.30303	1.15152	0.818182	0.606061	0.727273
YDR137W	RGP1	NEGATIVE	NEGATIVE	1.29915	1.39744	1.10256	1.12393	1.34188
YFR019W	FAB1	NEGATIVE	NEGATIVE	1.29861	1.25	1.29167	1.34028	1.29861
YIL117C	PRM5	NEGATIVE	NEGATIVE	1.2973	1.35135	1.83784	1.16216	1.16216
YHR171W	ATG7	NEGATIVE	NEGATIVE	1.29545	1.11364	1	1.45455	1.22727
YPL274W	SAM3	INM	INM	1.29424	1.11769	1.12744	0.971591	1.11891
YBR132C	AGP2	INM	INM	1.29091	1.2	1.89091	1.09091	1.38182
YBL089W	AVT5	NUCLEAR	NUCLEAR	1.29091	0.993939	0.945455	0.945455	1.12727
YEL036C	ANP1	NEGATIVE	NEGATIVE	1.28795	1.29835	1.20111	1.22351	1.48889
YJL143W	TIM17	NEGATIVE	NEGATIVE	1.28571	ND	1.35714	1.64286	3.14286
YDR089W	VTC5	NEGATIVE	NEGATIVE	1.28205	0.974359	1.15385	0.769231	0.948718
YBR127C	VMA2	NUCLEAR	NUCLEAR	1.27935	1.03299	1.19195	1.26692	1.1491
YGR023W	MTL1	NEGATIVE	NEGATIVE	1.27907	0.813953	1.18605	0.883721	0.674419
YPR113W	PIS1	INM	INM	1.27761	1.24387	1.14724	1.04755	1.1411
YGR266W	YGR266W	NUCLEAR	NUCLEAR	1.275	1.65625	1.5875	1.275	1.63125
YGL140C	YGL140C	INM	INM	1.275	1.525	0.975	1.05	1.65
YBR162W-A	YSY6	NEGATIVE	NEGATIVE	1.27419	2	1.46237	1.35484	2.08065
YOL163W	YOL163W	NEGATIVE	NEGATIVE	1.27211	1.56463	1.27211	1.58503	1.42857
YHR175W	CTR2	INM	INM	1.26777	1.25289	ND	1.09752	1.1124
YLR018C	POM34	INM	INM	1.26725	1.34853	1.2118	1.19494	1.1109
YCR061W	YCR061W	NEGATIVE	NEGATIVE	1.26667	1.23333	1.4	1.33333	1.23333
YOR071C	NRT1	NEGATIVE	NEGATIVE	1.26471	1.07843	0.529412	0.45098	0.882353
YIL046W-A	YIL046W-A	NUCLEAR	NUCLEAR	1.26357	1.08527	1.57364	1.20155	1.17829
YJR131W	MNS1	NEGATIVE	NEGATIVE	1.26316	1.25731	1.22807	1.71345	ND
YJL198W	PHO90	NEGATIVE	NEGATIVE	1.26154	0.784615	0.969231	0.561538	0.453846
YLL014W	EMC6	NEGATIVE	NEGATIVE	1.26087	1.66304	1.27174	1.56522	0.913043
YDR459C	PFA5	NEGATIVE	NEGATIVE	1.26087	0.869565	0.913043	1.34783	0.826087
YBR241C	YBR241C	NUCLEAR	NUCLEAR	1.25941	1.2198	1.47327	1.2297	1.25149
YGR055W	MUP1	INM	INM	1.25723	1.01125	0.898714	0.934084	ND
YBR078W	ECM33	NUCLEAR	NUCLEAR	1.25668	1.41176	1.28877	1.40107	1.23529
YDR126W	SWF1	NEGATIVE	NEGATIVE	1.25532	1.23404	1.10638	0.829787	1.29787
YLR149C	YLR149C	NEGATIVE	NEGATIVE	1.2551	1.42857	1.10204	1.44898	1.61224
YKR039W	GAP1	NUCLEAR	NUCLEAR	1.25446	ND	ND	0.929703	ND
YMR123W	PKR1	INM	INM	1.25293	1.03344	1.09641	1.07506	1.04909
YCL001W	RER1	INM	INM	1.25193	1.10668	1.23265	1.06298	1.10283
YDR534C	FIT1	NEGATIVE	NEGATIVE	1.25	2	1.58333	1.54167	0.666667
YLR297W	YLR297W	NEGATIVE	NEGATIVE	1.25	1.67857	1.75	1.85714	2.39286
YLL005C	SPO75	NEGATIVE	NEGATIVE	1.25	1.375	1.59375	0.625	1.5
YCR017C	CWH43	NEGATIVE	NEGATIVE	1.25	1.25	1.03571	1.21429	1.39286
YDL128W	VCX1	INM	INM	1.24866	ND	0.890572	0.961407	0.940401
YBL106C	SRO77	NEGATIVE	NUCLEAR	1.24818	1.15518	1.1015	1.14827	1.27949
YDR508C	GNP1	INM	INM	1.24815	1.36759	1.29259	1.25185	1.19167
YDL185W	VMA1	NUCLEAR	NUCLEAR	1.24722	1.41204	1.30926	1.47593	1.31944
YLR080W	EMP46	INM	INM	1.2459	1.36393	1.23279	0.931148	1.11148
YPL132W	COX11	NEGATIVE	NEGATIVE	1.24561	0.701754	0.736842	0.526316	0.859649
YER145C	FTR1	INM	INM	1.2449	5.20408	0.857143	5.02041	1.10204
YLR093C	NYV1	NEGATIVE	NEGATIVE	1.24468	1.39362	1.06383	1.12766	1.52128
YNL183C	NPR1	NUCLEAR	NUCLEAR	1.24444	ND	1.11111	0.937778	0.995556
YDR275W	BSC2	NEGATIVE	NEGATIVE	1.24242	2.15152	1.42424	1.57576	1.18182
YDL231C	BRE4	NEGATIVE	NEGATIVE	1.24138	1.82759	1.27586	1.44828	1.27586
YPL145C	KES1	NUCLEAR	NUCLEAR	1.23999	1.20978	1.3661	1.41501	1.2153
YML038C	YMD8	INM	INM	1.23926	1.34969	1.69939	1.03681	1.05521
YLR353W	BUD8	NEGATIVE	NEGATIVE	1.23881	1.52239	1.14925	0.791045	2.37313
YOR273C	TPO4	INM	INM	1.23729	1.11017	1.70339	1.22034	1.65254
YFL050C	ALR2	NEGATIVE	NEGATIVE	1.23718	1.17308	1.09615	1.16667	1.11538
YDR049W	VMS1	NUCLEAR	NUCLEAR	1.23697	1.45957	1.31752	1.50619	1.38995
YDR135C	YCF1	NEGATIVE	NEGATIVE	1.23684	1.47368	1.34211	1.36842	1.52632
YPR159W	KRE6	NEGATIVE	NEGATIVE	1.23669	1.36095	1.27811	1.18343	1.1716
YJR001W	AVT1	NEGATIVE	NEGATIVE	1.23656	1	1.25806	1.1828	1.31183
YNR055C	HOL1	INM	INM	1.23529	1.54902	1.2402	1.2598	1.13235
YDL206W	YDL206W	NEGATIVE	NEGATIVE	1.23529	1.82353	0.882353	ND	1.32353
YPR184W	GDB1	NUCLEAR	NUCLEAR	1.23232	1.23906	1.09596	1.13636	1.23232
YDR331W	GPI8	INM	INM	1.23169	1.32605	1.10601	1.14754	1.07541
YLL006W-A	YLL006W-A	NEGATIVE	NEGATIVE	1.23077	1.38462	2.19231	1.88462	0.807692
YPR201W	ARR3	NEGATIVE	NEGATIVE	1.22886	1.24378	1.0199	1.21891	0.9801
YDR108W	TRS85	NUCLEAR	NUCLEAR	1.22727	1.02797	0.926573	1.04196	1.11538
YDR236C	FMN1	NUCLEAR	NUCLEAR	1.22496	1.24631	1.3399	1.3514	1.64532
YNL238W	KEX2	NEGATIVE	NEGATIVE	1.22414	1.35632	1.47701	1.48276	1.17816
YBR302C	COS2	INM	INM	1.2233	ND	1.01942	0.825243	1.06796
YDR127W	ARO1	NUCLEAR	NUCLEAR	1.22308	1.04615	1.18462	1.30769	1.3
YHL048W	COS8	NEGATIVE	NEGATIVE	1.22302	1.20863	1.17986	1.17266	1.03597
YOR154W	SLP1	NEGATIVE	NEGATIVE	1.22086	1.28425	1.43558	1.04294	1.36196
YLL040C	VPS13	NEGATIVE	NEGATIVE	1.21759	1.17593	1.5	1.25926	1.27315
YHR135C	YCK1	NUCLEAR	NUCLEAR	1.21665	1.18123	1.19776	1.33018	1.28926
YJL062W	LAS21	INM	INM	1.21622	1.41441	1.13514	1.06306	1.51351
YER113C	TMN3	INM	INM	1.21477	ND	1.04027	1.15436	ND
YDL232W	OST4	NEGATIVE	NEGATIVE	1.21348	1.05618	1.43258	1.02809	1.32584
YGL053W	PRM8	INM	INM	1.21176	0.894118	1.41176	0.929412	0.988235
YDL054C	MCH1	INM	INM	1.21154	1.15385	1.01923	0.865385	0.865385
YBR069C	TAT1	INM	INM	1.2087	1.72174	1.54783	1.42609	1.51304
YPR079W	MRL1	NEGATIVE	NEGATIVE	1.20779	1.44156	1.2987	1.59091	1.27922
YCL030C	HIS4	NUCLEAR	NUCLEAR	1.20772	0.958457	1.36276	1.14318	1.21958
YLR081W	GAL2	NEGATIVE	NEGATIVE	1.20588	0.911765	0.882353	1.29412	0.764706
YKL141W	SDH3	NUCLEAR	NUCLEAR	1.20552	1.2362	1.23313	1.20552	1.30061
YDR033W	MRH1	INM	INM	1.20449	1.24993	1.17482	1.11067	1.05453
YPL162C	YPL162C	INM	INM	1.2036	0.911357	1.04155	1.07618	0.951524
YCR094W	CDC50	INM	INM	1.20225	1.32584	1.02247	1.31461	1.03371
YOR228C	MCP1	NUCLEAR	NUCLEAR	1.20207	1.34197	1.27979	2.18653	1.19689
YKL148C	SDH1	NEGATIVE	NEGATIVE	1.20172	1.24034	1.33906	1.06438	1.29185
YBR036C	CSG2	INM	INM	1.20061	1.18319	1.20212	1.03482	1.1726
YJL045W	YJL045W	NEGATIVE	NEGATIVE	1.2	ND	1.5	0.8	ND
YMR202W	ERG2	NUCLEAR	NUCLEAR	1.2	1.7	1.8	2.2	2.15
YDR107C	TMN2	INM	INM	1.19792	1.22917	1.19271	1.15625	1.09896
YDL092W	SRP14	INM	INM	1.19721	ND	1.25048	1.74424	1.3494
YPR138C	MEP3	NEGATIVE	NEGATIVE	1.19565	0.826087	1.32609	0.869565	1.06522
YDR189W	SLY1	NEGATIVE	NEGATIVE	1.19497	1.22642	1.22013	1.25786	1.31447
YKR021W	ALY1	NEGATIVE	NEGATIVE	1.19461	0.552023	0.635838	0.317919	0.513006
YKL124W	SSH4	NEGATIVE	NEGATIVE	1.19262	1.12705	1.12705	1.04098	1.26639
YMR319C	FET4	INM	INM	1.19178	1.20548	1.45205	1.12329	0.986301
YPL265W	DIP5	INM	INM	1.19075	1.15222	1.06358	0.99422	1.15992
YML018C	YML018C	INM	INM	1.19034	0.776812	0.692754	1.38841	0.956522
YAL030W	SNC1	NEGATIVE	NEGATIVE	1.18859	1.12195	1.23173	1.26572	1.18672
YGR012W	MCY1	NEGATIVE	NEGATIVE	1.18856	1.22034	1.25847	1.34746	1.45551
YOL076W	MDM20	NUCLEAR	NUCLEAR	1.1875	ND	1.11719	1.16146	1.13542
YNL101W	AVT4	NEGATIVE	NEGATIVE	1.18667	1.88	1.21333	1.24	1.70667
YKL174C	TPO5	INM	INM	1.18657	1.29104	1.08955	1.14552	1.50746
YGR089W	NNF2	NEGATIVE	NEGATIVE	1.18653	1.19171	1.25907	0.979275	1.07772
YLR046C	YLR046C	NEGATIVE	NEGATIVE	1.18627	ND	1.18137	0.980392	1.01471
YGR009C	SEC9	NEGATIVE	NEGATIVE	1.18579	0.961749	1.03825	1.04918	1.19672
YCR007C	YCR007C	NEGATIVE	NEGATIVE	1.18443	1.23361	1.14344	1.2377	1.34016
YBL050W	SEC17	NEGATIVE	NEGATIVE	1.18367	ND	0.77551	1.18367	1.30612
YGR157W	CHO2	NEGATIVE	NEGATIVE	1.18182	0.909091	1.04545	1
YIL111W	COX5B	NEGATIVE	NEGATIVE	1.17949	1.23077	0.974359	1.94872	1.12821
YKR030W	GMH1	NEGATIVE	NEGATIVE	1.17886	1.02439	1.09756	0.934959	1.11382
YDR410C	STE14	INM	INM	1.17868	1.22989	1.28213	1.47649	1.35841
YBL102W	SFT2	NEGATIVE	NEGATIVE	1.17832	1.41958	1.26224	1.12238	1.34965
YKL117W	SBA1	NUCLEAR	NUCLEAR	1.178	1.39761	1.29088	1.49928	1.30246
YOR307C	SLY41	INM	INM	1.17742	1.01613	0.830645	0.895161	0.870968
YNL044W	YIP3	INM	INM	1.17718	1.2549	1.27451	1.18866	1.08267
YGL144C	ROG1	NEGATIVE	NEGATIVE	1.17647	1.52941	2	1.35294	1.26471
YOL073C	DSC2	INM	INM	1.17526	ND	1.07216	0.814433	0.814433
YBR042C	CST26	NEGATIVE	NEGATIVE	1.175	1.175	1.175	0.8	0.875
YDL095W	PMT1	NEGATIVE	NEGATIVE	1.17391	2.21739	1.47826	1.86957	1.95652
YPL192C	PRM3	NUCLEAR	NUCLEAR	1.17091	0.949091	0.956364	1.32364	1.04364
YDL100C	GET3	NUCLEAR	NUCLEAR	1.17045	1.23295	1.13068	1.13068	1.39205
YHR028C	DAP2	NEGATIVE	NEGATIVE	1.16981	1.32704	1.08805	1.20755	1.0566
YPL277C	YPL277C	NEGATIVE	NEGATIVE	1.16667	2.16667	1.15556	0.833333	ND
YDR040C	ENA1	NEGATIVE	NEGATIVE	1.16667	1.19048	1.19048	0.666667	2.38095
YMR291W	TDA1	NUCLEAR	NUCLEAR	1.16656	0.950215	0.902889	1.16533	0.98402
YEL051W	VMA8	NUCLEAR	NUCLEAR	1.16649	1.1993	1.15288	1.09948	1.16859
YDR210W	YDR210W	NEGATIVE	NEGATIVE	1.16552	1.53103	1.21379	1.38276	1.33793
YBR040W	FIG1	NEGATIVE	NEGATIVE	1.16448	1.18777	0.956332	1.1441	1.11354
YOR268C	YOR268C	NUCLEAR	NUCLEAR	1.162	1.34904	1.33432	1.26068	1.39175
YEL031W	SPF1	NEGATIVE	NEGATIVE	1.16086	1.32875	1.28532	1.16813	1.36775
YDL246C	SOR2	NEGATIVE	NEGATIVE	1.16	1.92	1.24	1.64	1.64
YML075C	HMG1	INM	INM	1.15934	1.42308	1.14835	1.71978	1.04945
YNR026C	SEC12	NEGATIVE	NEGATIVE	1.15789	1.23246	1.10526	1.08772	1
YOL007C	CSI2	INM	INM	1.15625	1.85417	0.984375	1.85937	1.85937
YLR241W	CSC1	INM	INM	1.15625	0.916667	1	0.65625	0.8125
YBR164C	ARL1	NUCLEAR	NUCLEAR	1.15606	0.906426	1.12407	1.05834	0.968907
YJL170C	ASG7	NUCLEAR	NUCLEAR	1.15493	1.09859	1.56338	1.07042	1.19718
YOL002C	IZH2	NEGATIVE	NEGATIVE	1.15152	2.15152	1.57576	1.36364	1.87879
YDR414C	ERD1	NUCLEAR	NUCLEAR	1.15118	1.04438	1.03606	1.04854	0.933426
YMR171C	EAR1	NEGATIVE	NEGATIVE	1.15	1.075	0.75	0.725	0.925
YPR030W	CSR2	NUCLEAR	NUCLEAR	1.14667	1.90667	1.25333	ND	1.69333
YDL218W	YDL218W	NEGATIVE	NEGATIVE	1.14634	ND	1.04878	1.21951	0.926829
YAL026C	DRS2	INM	INM	1.14583	1.32099	1.21296	1.40509	1.31019
YKL175W	ZRT3	NEGATIVE	NEGATIVE	1.14573	1.13568	0.768844	ND	0.959799
YDR519W	FPR2	NUCLEAR	NUCLEAR	1.14523	1.18257	1.01798	1.21992	1.12863
YPR139C	LOA1	INM	INM	1.14443	1.13247	1.08832	1.17019	1.15547
YHR112C	YHR112C	NUCLEAR	NUCLEAR	1.14353	0.842353	1.14824	0.901176	0.783529
YBR086C	IST2	NEGATIVE	NEGATIVE	1.14286	2.42857	1.39286	1.82143	1.75
YLR070C	XYL2	NEGATIVE	NEGATIVE	1.14286	1.78571	1.5	1.32143	1.71429
YHR149C	SKG6	NEGATIVE	NEGATIVE	1.14211	1.13684	1.57895	1.10526	1.17895
YFL031W	HAC1	NEGATIVE	NEGATIVE	1.1407	ND	1.25628	0.834171	1.03518
YGL077C	HNM1	INM	INM	1.14068	1.03422	1.09506	1.01901	1.15589
YJL132W	YJL132W	NEGATIVE	NEGATIVE	1.14045	1.50562	1.21348	1.23596	1.11798
YPR071W	YPR071W	INM	INM	1.13939	3.99394	0.866667	1.2303	ND
YDR061W	YDR061W	NEGATIVE	NEGATIVE	1.13866	1.09244	1.16807	1.23529	1.29832
YOR175C	ALE1	INM	INM	1.1374	1.14218	1.22901	1.11641	1.22328
YDR497C	ITR1	INM	INM	1.13729	0.865953	1.00974	0.877313	1.11977
YCL012C	YCL012C	NEGATIVE	NEGATIVE	1.13725	1.82353	1.29412	0.882353	1.47059
YDR380W	ARO10	INM	INM	1.1371	1.24798	1.31452	1.40121	1.22782
YDL123W	SNA4	INM	INM	1.1371	1.16129	0.997312	1.14516	1.12903
YDL077C	VAM6	NEGATIVE	NEGATIVE	1.13313	0.807808	1.27628	0.831832	1.1021
YML125C	PGA3	INM	INM	1.13304	0.912609	0.996957	1.02043	1.07217
YJL129C	TRK1	NEGATIVE	NEGATIVE	1.13265	0.867347	0.897959	0.979592	0.748299
YBR046C	ZTA1	NUCLEAR	NUCLEAR	1.13146	1.20679	1.07829	1.14328	1.19547
YJR161C	COS5	INM	INM	1.13043	1.95652	2.69565	1.52174	0.826087
YJL027C	YJL027C	NEGATIVE	NEGATIVE	1.12903	0.870968	0.870968	0.774194	1
YPL019C	VTC3	NEGATIVE	NEGATIVE	1.12887	1.23196	1.34021	1.13402	1.21649
YGR125W	YGR125W	NEGATIVE	NEGATIVE	1.12667	0.833333	0.866667	0.853333	0.773333
YMR065W	KAR5	NEGATIVE	NEGATIVE	1.12608	1.01036	0.927461	0.880829	0.663212
YLR350W	ORM2	INM	INM	1.12511	1.07519	1.09512	1.13882	1.14332
YNL095C	YNL095C	NEGATIVE	NEGATIVE	1.125	1.5	1.40217	1.32065	ND
YCR101C	YCR101C	NEGATIVE	NEGATIVE	1.125	1.14	1.155	1.075	1.23
YPR109W	GLD1	NEGATIVE	NEGATIVE	1.125	1.02273	1.15341	1.05682	1.13068
YBR295W	PCA1	NEGATIVE	NEGATIVE	1.125	1.20833	0.833333	1.5	0.694444
YOL158C	ENB1	NEGATIVE	NEGATIVE	1.125	0.789474	1.08553	0.986842	2.68421
YKR043C	SHB17	NUCLEAR	NUCLEAR	1.1249	1.06613	1.13631	1.10793	1.23157
YBR005W	RCR1	NEGATIVE	NEGATIVE	1.12429	1.23887	1.13897	1.18783	1.22483
YLR373C	VID22	NUCLEAR	NUCLEAR	1.12326	1.38194	1.03646	1.1059	ND
YCR028C	FEN2	INM	INM	1.1227	1.30875	1.11094	1.11167	1.2431
YLL024C	SSA2	NUCLEAR	NUCLEAR	1.12261	1.02682	1.0613	1.16858	1.35632
YNR019W	ARE2	NEGATIVE	NEGATIVE	1.12195	0.512195	1.85366	0.780488	1
YML067C	ERV41	INM	INM	1.12036	1.09693	0.991115	1.07512	1.1147
YDR093W	DNF2	NEGATIVE	NEGATIVE	1.12017	2.02575	1.2103	1.30901	2.58798
YNL194C	YNL194C	NEGATIVE	NEGATIVE	1.11976	1.22754	1.01198	1.53293	1.20958
YKL046C	DCW1	INM	INM	1.11855	0.979924	0.928298	1.03537	0.951243
YMR237W	BCH1	NUCLEAR	NUCLEAR	1.11522	1.08677	1.10882	0.979374	0.972262
YNL058C	YNL058C	INM	INM	1.11494	1.32184	1.50575	1.09195	1.68966
YGL027C	CWH41	NEGATIVE	NEGATIVE	1.11374	1.16114	1.10427	0.966825	0.971564
YBR105C	VID24	NUCLEAR	NUCLEAR	1.11301	1.35708	1.20038	1.39316	1.22222
YDL072C	YET3	INM	INM	1.11264	0.822904	0.996245	0.978723	1.20651
YPL094C	SEC62	INM	INM	1.11189	0.755245	1.35664	1.16084	0.965035
YNL297C	MON2	NEGATIVE	NEGATIVE	1.11029	1	0.735294	0.889706	1.11029
YMR321C	YMR321C	NEGATIVE	NEGATIVE	1.10853	1.53488	1.08527	1.24031	1.37984
YJL004C	SYS1	INM	INM	1.10755	1.10145	1.0984	1.38215	0.961098
YDR246W	TRS23	NUCLEAR	NUCLEAR	1.1068	1.31068	1.23301	1.21359	1.14369
YIR033W	MGA2	NEGATIVE	NEGATIVE	1.10465	1.4186	3.52713	1.0814	1.51163
YDR267C	CIA1	NUCLEAR	NUCLEAR	1.10345	1.33621	1.42241	1.25	1.07759
YOR049C	RSB1	NEGATIVE	NEGATIVE	1.10241	1.25301	1.15663	1.1988	1.21084
YCR034W	ELO2	INM	INM	1.10187	1.11066	1.07787	1.0685	1.04333
YDR003W	RCR2	NEGATIVE	NEGATIVE	1.10121	1.21053	1.18623	1.12955	1.10121
YPL227C	ALG5	INM	INM	1.1	1.06667	1.23333	1.01667	0.8
YOR009W	TIR4	NEGATIVE	NEGATIVE	1.1	1.75714	1.17857	1.01429	0.964286
YLR173W	YLR173W	NEGATIVE	NEGATIVE	1.1	1.35	0.7	0.9	1.2
YBL081W	YBL081W	NUCLEAR	NUCLEAR	1.09934	1.19205	1.14404	1.08113	1.15397
YJL073W	JEM1	NEGATIVE	NEGATIVE	1.09877	1.47531	1.16667	1.32099	1.21605
YGR170W	PSD2	NUCLEAR	NUCLEAR	1.09845	1.19689	1.05699	1.15544	1.58031
YPR003C	YPR003C	INM	INM	1.09836	1.77049	0.672131	1.39344	1.77049
YLL031C	GPI13	INM	INM	1.09832	1.22542	1.30935	1.61391	ND
YNL008C	ASI3	INM	INM	1.09581	1.4491	ND	1.31737	1.47305
YNR047W	FPK1	NEGATIVE	NEGATIVE	1.09524	1.14286	1.09524	0.952381	1.19048
YFL025C	BST1	INM	INM	1.09259	1.09259	0.87037	0.888889	0.944444
YLR058C	SHM2	NUCLEAR	NUCLEAR	1.09103	1.00366	1.0581	1.06262	1.04132
YAR031W	PRM9	NEGATIVE	NEGATIVE	1.09091	1.21818	1.25455	1.20909	1.30909
YOL111C	MDY2	NUCLEAR	NUCLEAR	1.09091	1.81119	1.86014	1.53147	1.94406
YHR101C	BIG1	INM	INM	1.08971	1.02375	1.39842	1.08443	1.0686
YKR067W	GPT2	NEGATIVE	NEGATIVE	1.08962	1.20283	1.10377	0.933962	1.16038
YAL028W	FRT2	NEGATIVE	NEGATIVE	1.08955	1.29353	1.23881	1.33333	1.31343
YAL009W	SPO7	NEGATIVE	NEGATIVE	1.08946	1.29714	1.15654	1.2308	1.24739
YJL139C	YUR1	NEGATIVE	NEGATIVE	1.08929	0.142857	1.39286	0.553571	1.67857
YPL176C	TRE1	NEGATIVE	NEGATIVE	1.08824	1.52941	1.35294	1.17647	1.91176
YLR450W	HMG2	NEGATIVE	NEGATIVE	1.08772	1.19298	1.05263	1.17544	1.30702
YPL096C-A	ERI1	INM	INM	1.08765	1.01195	1.12749	3.85657	0.98008
YKL122C	SRP21	NUCLEAR	NUCLEAR	1.08711	1.02637	1.21248	0.959881	1.03195
YJL154C	VPS35	NEGATIVE	NEGATIVE	1.08597	1.08145	1	0.986425	1.11765
YCL005W	LDB16	NEGATIVE	NEGATIVE	1.08571	1.2	1.37143	1.34286	1.54286
YMR183C	SSO2	NEGATIVE	NEGATIVE	1.08333	1.52083	1.64583	1.16667	0.75
YGR041W	BUD9	NEGATIVE	NEGATIVE	1.08333	1.45833	0.916667	1	ND
YFL041W	FET5	INM	INM	1.08298	0.861463	0.922644	0.945851	0.936006
YDR069C	DOA4	NEGATIVE	NEGATIVE	1.08214	0.964286	0.642857	0.996429	0.942857
YOL129W	VPS68	INM	INM	1.08163	1.59184	1.11224	1.15306	1.10204
YJL212C	OPT1	NUCLEAR	NUCLEAR	1.08	1.70667	1.04	1.24	1.44
YNL270C	ALP1	NEGATIVE	NEGATIVE	1.07937	1.96825	1	0.984127	1.11111
YDR080W	VPS41	NEGATIVE	NEGATIVE	1.07917	1.02083	1.10833	1.10417	1.0375
YJR139C	HOM6	NUCLEAR	NUCLEAR	1.07869	1.31311	1.23934	1.40984	1.19016
YAL053W	FLC2	INM	INM	1.07705	1.26712	1.05651	1.15753	1.13356
YDL121C	YDL121C	INM	INM	1.07658	1.25976	1.1997	1.19069	1.18168
YJL031C	BET4	NUCLEAR	NUCLEAR	1.07604	1.26267	1.07373	1.14286	1.16014
YLR326W	YLR326W	INM	INM	1.07576	1.64773	0.988636	1.10227	2.05682
YMR013C	SEC59	NEGATIVE	NEGATIVE	1.075	1.025	0.95	0.675	0.55
YGL002W	ERP6	INM	INM	1.07485	0.673653	0.685629	1.47006	0.868263
YKL015W	PUT3	NUCLEAR	NUCLEAR	1.07366	1.1875	1.09375	1.12277	1.03348
YDR245W	MNN10	NEGATIVE	NEGATIVE	1.07353	1.11765	1.01471	ND	1.18627
YDR018C	YDR018C	NUCLEAR	NUCLEAR	1.07192	1.06164	0.989726	1.14041	1.38014
YCR011C	ADP1	NEGATIVE	NEGATIVE	1.07143	1.57143	1.28571	1.21429	1.96429
YKL165C	MCD4	INM	INM	1.06897	1.24229	1.04356	1.19601	1.11434
YCL069W	VBA3	NEGATIVE	NEGATIVE	1.06855	1.125	1.04839	1.25806	1.23387
YMR110C	HFD1	NEGATIVE	NEGATIVE	1.06803	1.18027	1.06463	1.0102	1.57823
YER001W	MNN1	NEGATIVE	NEGATIVE	1.0676	1.4207	1.11604	1.24934	1.24681
YNL280C	ERG24	INM	INM	1.06757	0.996396	1.1009	1.00811	1.09189
YBR054W	YRO2	NEGATIVE	NEGATIVE	1.0625	ND	ND	0.666667	0.833333
YHR060W	VMA22	INM	INM	1.06067	ND	1.37528	1.31236	1.31236
YDR233C	RTN1	NEGATIVE	NEGATIVE	1.0605	1.20641	1.13167	1.11744	1.09253
YGR007W	ECT1	NUCLEAR	NUCLEAR	1.05962	1.05757	1.15762	1.12658	1.11923
YKL080W	VMA5	NUCLEAR	NUCLEAR	1.05817	1.09972	1.25762	1.16066	1.96491
YDR100W	TVP15	INM	INM	1.058	1.13618	1.00447	1.03535	1.0528
YLR100W	ERG27	INM	INM	1.05714	1.51429	1.35	1.34286	1.46429
YDR302W	GPI11	INM	INM	1.05606	1.09343	1.03253	1.15848	1.06782
YKR053C	YSR3	NEGATIVE	NEGATIVE	1.05556	1.75	1.36111	1.63889	1.19444
YMR022W	UBC7	INM	INM	1.05451	ND	1.71301	1.4861	1.34372
YDR038C	ENA5	NEGATIVE	NEGATIVE	1.05405	1.51351	0.756757	1.18919	1.10811
YDR284C	DPP1	INM	INM	1.05388	1.06466	0.991379	1.03017	1.12931
YOR316C	COT1	INM	INM	1.05385	1.22308	0.838462	1.04615	1.12308
YIL065C	FIS1	NUCLEAR	NUCLEAR	1.05308	ND	1.07102	ND	1.16643
YAL067C	SEO1	INM	INM	1.05263	1.14912	1.18421	1.14912	1.2193
YMR300C	ADE4	NUCLEAR	NUCLEAR	1.05157	0.71671	0.877285	0.847911	0.885117
YML008C	ERG6	INM	INM	1.05063	1.22061	1.07233	1.04882	1.09765
YDL194W	SNF3	NEGATIVE	NEGATIVE	1.05	1.825	ND	2.575	1.55833
YOR115C	TRS33	NUCLEAR	NUCLEAR	1.04918	1.06375	0.985428	1.11475	1.04918
YGR061C	ADE6	NUCLEAR	NUCLEAR	1.04865	1.13536	1.22832	1.22351	ND
YIL005W	EPS1	INM	INM	1.04762	1.46032	1.04762	1.30159	1.53968
YER060W-A	FCY22	NEGATIVE	NEGATIVE	1.04762	1.10714	1.14286	2.25	1.5
YOL162W	YOL162W	NEGATIVE	NEGATIVE	1.04762	0.857143	3.28571	1.01587	0.904762
YGL247W	BRR6	INM	INM	1.04762	1.07619	0.87619	0.866667	0.961905
YDR297W	SUR2	INM	INM	1.04735	1.23955	1.43918	ND	1.07614
YAR027W	UIP3	INM	INM	1.04719	1.04356	1.09437	1.10526	1.2069
YBL098W	BNA4	NEGATIVE	NEGATIVE	1.04545	ND	1.25	0.840909	2.36364
YNL130C	CPT1	INM	INM	1.04497	0.751323	0.931217	0.753968	0.910053
YBR220C	YBR220C	NUCLEAR	NUCLEAR	1.04478	1.29851	1.28358	1.34328	1.14925
YMR205C	PFK2	NUCLEAR	NUCLEAR	1.04471	1.062	1.07064	1.13383	1.10999
YOL060C	MAM3	NEGATIVE	NEGATIVE	1.04444	1.51111	1.31111	1.22222	0.755556
YEL042W	GDA1	NEGATIVE	NEGATIVE	1.04348	2	0.869565	1.78261	2.26087
YLL025W	PAU17	NEGATIVE	NEGATIVE	1.04348	1.21739	2.17391	1.26087	1.47826
YIL173W	VTH1	NEGATIVE	NEGATIVE	1.04324	1.30811	1.11351	1.07568	1.10811
YFL007W	BLM10	NUCLEAR	NUCLEAR	1.04209	1.12969	1.01024	0.969283	1.14676
YLR084C	RAX2	INM	INM	1.04167	1.10417	1.29167	1.8125	0.916667
YNL279W	PRM1	NEGATIVE	NEGATIVE	1.03979	0.994695	0.795756	0.745358	1.28647
YER140W	EMP65	INM	INM	1.03891	1.01946	1.05447	0.945525	1.06615
YDL222C	FMP45	NEGATIVE	NEGATIVE	1.03879	1.15086	1.11207	1.13362	1.15517
YOR085W	OST3	NEGATIVE	NEGATIVE	1.03774	1.43396	0.735849	0.45283	0.930818
YPR088C	SRP54	NEGATIVE	NEGATIVE	1.0373	ND	1.36597	1.12587	2.7366
YOR008C	SLG1	INM	INM	1.03691	ND	0.983221	0.848993	0.993289
YOL092W	YPQ1	INM	INM	1.03659	1.23171	1.04878	0.945122	1.48171
YIL090W	ICE2	INM	INM	1.03623	ND	1.05978	1.14493	1.19807
YPR114W	YPR114W	INM	INM	1.03388	1.04569	1.06982	1.01437	1.08111
YGR263C	SAY1	INM	INM	1.03125	1.01736	0.993056	1.13889	1.11458
YNL007C	SIS1	NUCLEAR	NUCLEAR	1.03084	1.17539	1.07847	1.1853	1.05176
YCL027W	FUS1	NEGATIVE	NEGATIVE	1.02985	1.22388	0.930348	1.14925	1.40299
YDR375C	BCS1	NUCLEAR	NUCLEAR	1.02778	1.36111	1.11111	1.5	1.44444
YOL130W	ALR1	NEGATIVE	NEGATIVE	1.02655	1.14159	1.06195	1.11504	1.21239
YBR238C	YBR238C	NUCLEAR	NUCLEAR	1.02564	1.26546	1.08296	1.28205	0.941176
YBR110W	ALG1	INM	INM	1.02532	1.10127	1.28481	0.962025	0.917722
YER118C	SHO1	INM	INM	1.02381	0.97619	1	0.47619	0.738095
YJL085W	EXO70	NUCLEAR	NUCLEAR	1.02299	1.10728	1.03065	0.89272	1.1954
YBL011W	SCT1	INM	INM	1.02222	1.13827	1.1284	1.14568	1.23457
YAL007C	ERP2	INM	INM	1.02081	1.00543	1.0362	1.10317	1.03258
YNR060W	FRE4	NEGATIVE	NEGATIVE	1.02041	0.857143	1.59184	1.2449	1.44898
YPR192W	AQY1	NEGATIVE	NEGATIVE	1.02027	1.10135	1.06081	1.06757	1.05405
YDR388W	RVS167	NUCLEAR	NUCLEAR	1.01818	1.12606	0.981818	1.10303	1.06303
YBR210W	ERV15	INM	INM	1.01613	1.14516	1.25806	1.09677	1.14516
YLR034C	SMF3	NEGATIVE	NEGATIVE	1.01554	1.04145	1.36788	1.21589	1.85492
YBR283C	SSH1	INM	INM	1.01484	0.935427	0.989932	1.21074	1.2291
YKL008C	LAC1	INM	INM	1.01408	0.998122	1.04695	0.967136	0.950235
YJR117W	STE24	INM	INM	1.00983	0.879357	0.927614	0.919571	1.12422
YOR075W	UFE1	NEGATIVE	NEGATIVE	1.00526	0.947368	1.02632	1.09474	1
YLR083C	EMP70	INM	INM	1.0047	0.945141	0.884013	0.990596	0.924765
YMR197C	VTI1	NEGATIVE	NEGATIVE	1.00441	ND	0.938326	0.898678	1.05727
YKL096W-A	CWP2	NUCLEAR	NUCLEAR	1.00346	0.950404	0.94925	1.04844	1.29296
YGR240C	PFK1	NUCLEAR	NUCLEAR	1.00173	0.965137	1.07992	1.08518	1.15713
YMR058W	FET3	INM	INM	1.00062	1.04877	1.03642	0.858642	1.27346
YKR103W	NFT1	NEGATIVE	NEGATIVE	1	1.80769	1.19231	1.73077	1
YGR036C	CAX4	NEGATIVE	NEGATIVE	1	1.33333	1.08333	1.33333	ND
YJL059W	YHC3	NEGATIVE	NEGATIVE	1	1.1592	0.920398	1.03483	1.35821
YKR088C	TVP38	NUCLEAR	NUCLEAR	1	0.620438	0.695864	0.647202	0.83455
YML013W	UBX2	INM	INM	1	1.39241	0.993671	1.08861	1.93671
YMR056C	AAC1	NEGATIVE	NEGATIVE	1	2.18182	2.86364	1.36364	2.31818
YMR162C	DNF3	NEGATIVE	NEGATIVE	1	2.14403	1.13992	0.683128	0.720165
YLR342W	FKS1	NEGATIVE	NEGATIVE	1	1.86765	0.882353	0.838235	1.26471
YPL232W	SSO1	NEGATIVE	NEGATIVE	1	1.38255	0.785235	0.852349	ND
YLR152C	YLR152C	NEGATIVE	NEGATIVE	1	1.22222	0.555556	1.27778	1.11111
YGL098W	USE1	NEGATIVE	NEGATIVE	1	1	1.51852	1	1.03704
YBL101C	ECM21	NEGATIVE	NEGATIVE	1	0.972678	1.06011	1.10383	1.07104
YCR021C	HSP30	NEGATIVE	NEGATIVE	1	1.67857	1.35714	1.35714	1.42857
YDR160W	SSY1	NEGATIVE	NEGATIVE	1	1.4386	1.39474	1	2.60526
YKL063C	YKL063C	NEGATIVE	NEGATIVE	0.996169	1.00383	1.11494	1.15709	1.08812
YMR200W	ROT1	INM	INM	0.995889	1.28777	0.94964	1.13052	1.13155
YDR498C	SEC20	NEGATIVE	NEGATIVE	0.995475	1.17195	1.1267	1.1086	0.959276
YAR028W	YAR028W	INM	INM	0.994748	0.945378	1.0063	0.973739	0.982143
YLR457C	NBP1	INM	INM	0.99435	0.903955	1.00565	1.10169	0.960452
YAL061W	BDH2	NUCLEAR	NUCLEAR	0.993187	1.05753	1.22332	1.162	1.15973
YPL189W	GUP2	NEGATIVE	NEGATIVE	0.992754	0.963768	0.833333	1.03623	1.02899
YHL028W	WSC4	NEGATIVE	NEGATIVE	0.989474	1.06842	1.00526	0.863158	1.05789
YPR170W-B	YPR170W-B	INM	INM	0.987988	0.954955	0.930931	0.956456	0.977477
YAL014C	SYN8	NEGATIVE	NEGATIVE	0.986755	1.10596	1.06623	1.12583	1.0596
YJR058C	APS2	NUCLEAR	NUCLEAR	0.986139	1.09505	0.99802	1.0099	0.952475
YJL219W	HXT9	NEGATIVE	NEGATIVE	0.985507	1.42029	1.62319	1.31884	1.17391
YNL176C	TDA7	INM	INM	0.982143	1.07143	1.25	1.39286	1.26786
YPL175W	SPT14	INM	INM	0.981481	0.527778	0.712963	0.888889	0.907407
YDR164C	SEC1	NUCLEAR	NUCLEAR	0.981366	1.24431	0.935818	1.27743	1.03934
YBR070C	ALG14	INM	INM	0.979048	1.13599	1.05412	1.05362	1.0403
YDR046C	BAP3	INM	INM	0.977316	0.905482	0.648393	0.676749	0.799622
YBL017C	PEP1	INM	INM	0.977124	1.13725	1.10131	1.20261	1.11111
YBL020W	RFT1	NEGATIVE	NEGATIVE	0.976378	0.944882	0.92126	0.84252	0.972441
YOR270C	VPH1	INM	INM	0.97306	1.24138	0.931034	1.19935	0.753233
YGR016W	YGR016W	INM	INM	0.971831	1.05164	0.915493	0.760563	1.04225
YOL122C	SMF1	NEGATIVE	NEGATIVE	0.971429	1.24286	0.928571	0.842857	1.35714
YDR420W	HKR1	NEGATIVE	NEGATIVE	0.971429	1.2	1.31429	0.942857	1.37143
YDR452W	PPN1	NUCLEAR	NUCLEAR	0.971014	ND	1.25362	1.71739	2.68841
YNL291C	MID1	NEGATIVE	NEGATIVE	0.970588	1.21569	1.02451	0.946078	1.11275
YGL142C	GPI10	NEGATIVE	NEGATIVE	0.969072	1	0.938144	ND	0.943299
YBR208C	DUR1,2	NUCLEAR	NUCLEAR	0.96875	1.46875	1.34375	1.375	1.6875
YMR281W	GPI12	NEGATIVE	NEGATIVE	0.968553	1.25786	0.836478	0.716981	1.74843
YNL322C	KRE1	INM	INM	0.968205	0.72	0.636923	1.05949	0.885128
YEL006W	YEA6	NEGATIVE	NEGATIVE	0.967742	0.870968	1.48387	0.967742	0.83871
YER178W	PDA1	NEGATIVE	NEGATIVE	0.966667	2.13333	0.766667	0.633333	1.26667
YDR276C	PMP3	INM	INM	0.96612	ND	0.847814	1.01311	ND
YDL012C	YDL012C	NEGATIVE	NEGATIVE	0.966102	1.05085	1.0339	1.20763	1.43644
YLR065C	ENV10	NEGATIVE	NEGATIVE	0.962963	2.66667	0.703704	1.40741	1.74074
YPL264C	YPL264C	INM	INM	0.961538	2.32143	1.56593	1.24176	1.00824
YNL154C	YCK2	NUCLEAR	NUCLEAR	0.96141	0.919109	0.877551	0.897959	1.06382
YNR049C	MSO1	NUCLEAR	NUCLEAR	0.961089	1.01946	0.70428	1.31518	0.848249
YFL016C	MDJ1	NEGATIVE	NEGATIVE	0.96	0.92	1.4	1.4	0.96
YAL060W	BDH1	NUCLEAR	NUCLEAR	0.958714	1.13604	0.988579	0.984264	1.08299
YOL156W	HXT11	NEGATIVE	NEGATIVE	0.957447	0.978723	1.02128	0.624113	1.93617
YBL047C	EDE1	NEGATIVE	NEGATIVE	0.956311	1.1068	1.24757	1.06311	1.1068
YMR011W	HXT2	INM	INM	0.956044	1.01099	ND	0.846154	0.89011
YLR240W	VPS34	NUCLEAR	NUCLEAR	0.955645	0.806452	0.875	1.30645	0.850806
YGL047W	ALG13	NUCLEAR	NUCLEAR	0.952706	0.873883	0.942197	0.961114	0.982659
YLR459W	GAB1	INM	INM	0.951768	0.96463	0.829582	0.919614	0.993569
YNL054W	VAC7	NEGATIVE	NEGATIVE	0.95092	0.957055	0.809816	2.68098	1.3865
YOR089C	VPS21	NUCLEAR	NUCLEAR	0.950645	ND	0.896674	1.02699	ND
YGR143W	SKN1	NEGATIVE	NEGATIVE	0.949333	0.586667	0.666667	0.682667	0.632
YDR051C	DET1	NUCLEAR	NUCLEAR	0.949206	1.13016	1.15661	1.16508	1.22434
YLR413W	INA1	NEGATIVE	NEGATIVE	0.948052	1.09091	1.77922	0.883117	1.45455
YDR192C	NUP42	INM	INM	0.947712	1.03268	0.965142	0.85984	0.840959
YKL002W	DID4	NEGATIVE	NEGATIVE	0.947368	1.54737	1.10526	1.04211	2.01579
YIL158W	AIM20	NEGATIVE	NEGATIVE	0.947368	2.10526	1.21053	1.21053	1.31579
YKL020C	SPT23	NEGATIVE	NEGATIVE	0.947195	0.50495	0.414191	0.344884	0.490099
YFL044C	OTU1	NUCLEAR	NUCLEAR	0.945858	0.731898	0.934116	1.11872	1.29876
YCR043C	YCR043C	INM	INM	0.945055	1.31868	0.961538	1.14835	1.04945
YFL048C	EMP47	INM	INM	0.944954	1.04587	0.972477	0.977064	1.13303
YLR110C	CCW12	NEGATIVE	NEGATIVE	0.944444	1.11111	0.833333	1.66667	1.55556
YDR524C-B	YDR524C-B	NUCLEAR	NUCLEAR	0.943598	0.847674	0.880815	0.856731	0.927336
YJL192C	SOP4	INM	INM	0.939968	0.987362	0.958926	1.02607	0.973934
YDR120C	TRM1	INM	INM	0.939304	0.956329	1.38046	1.0111	0.959289
YBL082C	ALG3	INM	INM	0.938272	0.962963	1.08642	1.01235	ND
YNR072W	HXT17	NEGATIVE	NEGATIVE	0.9375	1.95833	0.770833	0.833333	2.16667
YER185W	PUG1	NEGATIVE	NEGATIVE	0.9375	1.28125	1.53125	1.1875	0.875
YHR201C	PPX1	NUCLEAR	NUCLEAR	0.93704	ND	0.807032	1.28373	0.577269
YMR272C	SCS7	INM	INM	0.935644	0.749175	0.415842	0.475248	0.440594
YPR028W	YOP1	INM	INM	0.935185	1.62037	1.73148	1.33796	1.55324
YEL033W	MTC7	NUCLEAR	NUCLEAR	0.935185	0.854167	1	0.895833	1.16435
YOR246C	ENV9	INM	INM	0.933333	2.48889	2	2.13333	4.31111
YCL073C	GEX1	NEGATIVE	NEGATIVE	0.932153	0.882006	0.79056	1.0944	1.10521
YJL038C	LOH1	NEGATIVE	NEGATIVE	0.931034	ND	0.793103	0.965517	3.26437
YBR008C	FLR1	NEGATIVE	NEGATIVE	0.930233	ND	1.04651	1.11628	ND
YJL204C	RCY1	NUCLEAR	NUCLEAR	0.93	1.475	1.0125	1.1475	0.795
YER100W	UBC6	NEGATIVE	NEGATIVE	0.928571	0.871429	0.861905	0.92381	1.01429
YJL053W	PEP8	NUCLEAR	NUCLEAR	0.926893	ND	ND	0.939948	ND
YNR069C	BSC5	NEGATIVE	NEGATIVE	0.925926	0.797531	1.26667	0.676543	1.08395
YDL081C	RPP1A	NEGATIVE	NEGATIVE	0.923767	0.793722	0.773543	0.676009	0.699552
YNL305C	BXI1	NEGATIVE	NEGATIVE	0.923077	1.24615	0.784615	1.16923	1.03077
YLL028W	TPO1	INM	INM	0.921569	1.05882	1.17647	0.941176	0.764706
YOR048C	RAT1	NUCLEAR	NUCLEAR	0.920705	1.39207	1.07048	1.27753	1.38767
YOR149C	SMP3	NEGATIVE	NEGATIVE	0.919118	0.992647	1.11765	1.01471	1.07353
YJL108C	PRM10	NEGATIVE	NEGATIVE	0.917808	1.0137	1.41096	0.808219	1.0274
YFR042W	KEG1	INM	INM	0.917241	ND	1.01609	ND	0.906897
YOL103W	ITR2	INM	INM	0.916667	1.70833	1.04167	1.20833	1.5
YOL086C	ADH1	NUCLEAR	NUCLEAR	0.915865	0.553269	0.951709	1.19267	1.18088
YMR266W	RSN1	INM	INM	0.914414	1.13964	0.842342	0.914414	0.918919
YMR238W	DFG5	INM	INM	0.914286	1.01905	0.904762	0.8	1.25714
YIR022W	SEC11	INM	INM	0.913978	1.17204	1.16129	0.978495	1.12366
YOR036W	PEP12	NEGATIVE	NEGATIVE	0.913793	0.982759	0.890805	1.24713	0.821839
YFL011W	HXT10	NEGATIVE	NEGATIVE	0.913043	1.21739	1.34783	1.34783	1.21739
YKL154W	SRP102	INM	INM	0.911944	0.978204	0.928509	0.974717	1.1299
YDR084C	TVP23	INM	INM	0.911894	1.01762	0.843612	0.832599	1.0837
YDR506C	GMC1	INM	INM	0.911765	1.17647	1.05882	1.17647	1.08824
YDL027C	MRX9	NEGATIVE	NEGATIVE	0.911765	0.617647	0.676471	0.941176	0.911765
YHR092C	HXT4	INM	INM	0.907095	0.714527	0.572635	0.704392	0.704392
YJR040W	GEF1	INM	INM	0.90378	1.05842	0.934708	0.986254	1.05498
YDR456W	NHX1	INM	INM	0.901639	0.770492	0.836066	0.877049	0.918033
YIR028W	DAL4	NEGATIVE	NEGATIVE	0.9	2.45	1.1	1.3	1.05
YDR182W	CDC1	NEGATIVE	NEGATIVE	0.9	1.59	1.08	0.9	1.29
YLR361C	DCR2	NEGATIVE	NEGATIVE	0.89899	1.19865	0.757576	0.821549	2.34343
YOR254C	SEC63	INM	INM	0.898113	0.720755	0.856604	0.87044	0.826415
YJL128C	PBS2	NUCLEAR	NUCLEAR	0.897959	0.979592	0.969388	0.867347	1.0102
YNL065W	AQR1	INM	INM	0.896552	1.27586	0.896552	0.931034	1.13793
YDR281C	PHM6	NEGATIVE	NEGATIVE	0.896552	1.2069	2	1.93103	1.75862
YOL013C	HRD1	INM	INM	0.896104	1.55844	1.24675	ND	1.15584
YDR525W-A	SNA2	INM	INM	0.895193	0.999212	1.47991	1.43262	1.48306
YMR253C	YMR253C	NEGATIVE	NEGATIVE	0.894737	3.36842	1.21053	1.05263	2.10526
YKL107W	YKL107W	NUCLEAR	NUCLEAR	0.892857	0.486264	ND	1.01648	0.722527
YEL004W	YEA4	INM	INM	0.891304	0.891304	1.76087	0.73913	1.34783
YPL257W	YPL257W	INM	INM	0.890625	1.09375	1.0625	1.03125	0.96875
YLL061W	MMP1	NEGATIVE	NEGATIVE	0.888889	1.38889	0.944444	0.944444	1.13889
YGL200C	EMP24	INM	INM	0.886452	0.87871	0.997419	0.947097	0.988387
YJL019W	MPS3	NEGATIVE	NEGATIVE	0.886364	1.63636	3.20455	1.73864	0.681818
YJL196C	ELO1	INM	INM	0.886179	0.99187	1.09756	0.772358	1.18699
YAL018C	LDS1	NEGATIVE	NEGATIVE	0.886076	0.879747	0.905063	0.993671	1
YDL237W	AIM6	NEGATIVE	NEGATIVE	0.884615	ND	1.30769	2.03846	1.42308
YDL210W	UGA4	NEGATIVE	NEGATIVE	0.882812	1.12891	0.953125	1.01172	0.972656
YLR356W	ATG33	NEGATIVE	NEGATIVE	0.88	2.01333	1.66667	1.89333	2.52
YNR048W	YNR048W	NEGATIVE	NEGATIVE	0.88	1.02667	1.14667	1.2	1
YGL158W	RCK1	NEGATIVE	NEGATIVE	0.878049	0.97561	0.853659	1.12195	1.12195
YGR149W	GPC1	NEGATIVE	NEGATIVE	0.877828	ND	0.841629	1.01357	0.837104
YIL048W	NEO1	INM	INM	0.875862	0.97931	0.841379	1.03448	1.21379
YJR044C	VPS55	INM	INM	0.875	1.1875	1.1875	0.9375	0.875
YER004W	FMP52	INM	INM	0.873706	ND	1.08903	0.813665	0.861284
YLR372W	ELO3	INM	INM	0.873319	0.90291	0.775006	0.905193	0.854977
YCR098C	GIT1	NEGATIVE	NEGATIVE	0.872951	1.02459	0.942623	1	1.02869
YMR166C	MME1	NEGATIVE	NEGATIVE	0.872483	0.993289	0.852349	0.959732	1.12081
YDR287W	INM2	NUCLEAR	NUCLEAR	0.872093	1.33721	0.918605	1.13953	1.2907
YCR048W	ARE1	NEGATIVE	NEGATIVE	0.871795	ND	1.28205	1.35897	1.20513
YMR306W	FKS3	NEGATIVE	NEGATIVE	0.871429	1.02857	1.2	0.957143	0.842857
YDR342C	HXT7	INM	INM	0.870968	0.686636	0.792627	0.258065	0.866359
YGL012W	ERG4	INM	INM	0.870194	1.08705	0.925254	0.914795	0.843433
YOR016C	ERP4	INM	INM	0.869681	0.851064	0.957447	0.890957	0.914894
YML072C	TCB3	NEGATIVE	NEGATIVE	0.869565	1.0559	0.863354	0.881988	1.15528
YGL010W	MPO1	INM	INM	0.868421	1.03509	0.649123	0.763158	1.01754
YHR096C	HXT5	INM	INM	0.866667	1.56667	1.2	0.833333	1.28333
YBR293W	VBA2	NEGATIVE	NEGATIVE	0.866667	1.0037	0.855556	1.03333	0.881481
YPR075C	OPY2	NEGATIVE	NEGATIVE	0.866667	0.977778	1.04444	0.911111	0.577778
YPR176C	YPR170W-B	NUCLEAR	NUCLEAR	0.863799	1.03943	0.96595	1.02688	0.840502
YPL219W	PCL8	NUCLEAR	NUCLEAR	0.8625	1.6875	0.8375	0.95	0.9625
YNL087W	TCB2	NEGATIVE	NEGATIVE	0.860759	1.29114	0.746835	1.13924	1.29114
YEL002C	WBP1	INM	INM	0.860294	0.802941	0.779412	0.829412	1.075
YMR148W	OSW5	INM	INM	0.859375	0.859375	1.40625	1.1875	1.54688
YPL207W	TYW1	NEGATIVE	NEGATIVE	0.857143	ND	0.55102	0.489796	1.0068
YIL067C	YIL067C	NEGATIVE	NEGATIVE	0.857143	1.14286	0.857143	1.04762	0.904762
YGL160W	AIM14	INM	INM	0.857143	1.14286	1.28571	1.5	0.809524
YJL084C	ALY2	NEGATIVE	NEGATIVE	0.854962	1.01527	0.847328	0.992366	1.00382
YAL058W	CNE1	INM	INM	0.849741	0.707254	0.818653	0.740933	0.875648
YNR065C	YNR065C	NEGATIVE	NEGATIVE	0.849057	1.09434	1.75472	0.754717	1.13208
YMR218C	TRS130	NEGATIVE	NEGATIVE	0.846561	ND	ND	ND	ND
YNR030W	ALG12	NEGATIVE	NEGATIVE	0.84507	1.07042	0.732394	0.746479	0.633803
YPL042C	SSN3	NUCLEAR	NUCLEAR	0.844828	0.965517	0.905172	0.784483	0.956897
YOR124C	UBP2	NUCLEAR	NUCLEAR	0.842829	0.860511	0.750491	0.905697	0.781925
YBR067C	TIP1	NUCLEAR	NUCLEAR	0.842266	ND	0.998469	0.695253	0.683002
YER166W	DNF1	NEGATIVE	NEGATIVE	0.842105	0.910931	0.765182	0.890688	1.02429
YOR324C	FRT1	NEGATIVE	NEGATIVE	0.839506	1.40123	0.950617	0.771605	1.25309
YMR008C	PLB1	INM	INM	0.83871	1.5	0.629032	0.693548	ND
YML066C	SMA2	NEGATIVE	NEGATIVE	0.837209	1.83721	1.11628	0.488372	1.11628
YBR296C	PHO89	NEGATIVE	NEGATIVE	0.837209	0.930233	1.69767	ND	ND
YLR189C	ATG26	NUCLEAR	NUCLEAR	0.833828	0.537092	0.577646	ND	0.474777
YPL186C	UIP4	INM	INM	0.830827	0.962406	0.928571	0.898496	0.898496
YLR047C	FRE8	NEGATIVE	NEGATIVE	0.827586	1.86207	0.586207	1.03448	2
YAR023C	YAR023C	NEGATIVE	NEGATIVE	0.823529	0.735294	1.70588	1.17647	0.882353
YOL084W	PHM7	NEGATIVE	NEGATIVE	0.820513	1.08974	1.12821	1.08974	0.705128
YMR149W	SWP1	INM	INM	0.809524	1.30159	0.571429	1.09524	1
YKL096W	CWP1	NEGATIVE	NEGATIVE	0.808824	1.22549	1.16667	ND	ND
YOR365C	YOR365C	NEGATIVE	NEGATIVE	0.805825	1.1068	1.29126	0.825243	1
YDL018C	ERP3	INM	INM	0.803719	0.448347	0.85124	0.878099	0.938017
YLR148W	PEP3	NEGATIVE	NEGATIVE	0.801527	1.14504	1.35878	1.28244	ND
YNR017W	TIM23	NEGATIVE	NEGATIVE	0.801136	0.801136	0.784091	1.00568	1.27841
YCR024C-B	YCR024C-B	NUCLEAR	NUCLEAR	0.799555	ND	0.567929	0.467706	1.02227
YBR201W	DER1	INM	INM	0.799363	1.09873	0.863057	1.84713	0.754777
YGR049W	SCM4	NUCLEAR	NUCLEAR	0.793651	1.15873	0.968254	1.11111	ND
YOR097C	YOR097C	INM	INM	0.790909	0.933333	0.563636	1.01818	ND
YOL020W	TAT2	NEGATIVE	NEGATIVE	0.79	0.82	0.89	0.59	0.94
YFL034W	MIL1	NUCLEAR	NUCLEAR	0.785515	0.715877	0.816156	0.876509	0.793872
YLL015W	BPT1	NEGATIVE	NEGATIVE	0.783505	0.701031	0.556701	1.02062	0.726804
YCR067C	SED4	NEGATIVE	NEGATIVE	0.781955	0.954887	0.819549	0.800752	0.864662
YKL119C	VPH2	INM	INM	0.779255	0.631206	0.529255	0.414894	0.534574
YEL013W	VAC8	NUCLEAR	NUCLEAR	0.777893	0.957645	0.815083	0.951446	1.00723
YDL199C	YDL199C	NEGATIVE	NEGATIVE	0.774194	2.32258	1.6129	1.6129	2.03226
YHR111W	UBA4	NEGATIVE	NEGATIVE	0.771429	1.4	1.62857	1	1.45714
YLR194C	NCW2	NUCLEAR	NUCLEAR	0.771028	ND	0.528037	0.399533	0.607477
YKR009C	FOX2	NEGATIVE	NEGATIVE	0.769231	1.13462	1.46154	1.30769	1.51923
YKR027W	BCH2	NUCLEAR	NUCLEAR	0.758701	0.844548	0.994365	1.0232	0.993039
YDL149W	ATG9	NEGATIVE	NEGATIVE	0.756098	ND	0.536585	1.4878	0.902439
YMR325W	PAU19	NEGATIVE	NEGATIVE	0.755319	0.553191	0.840426	0.734043	1.20213
YOR087W	YVC1	NEGATIVE	NEGATIVE	0.754717	0.754717	0.811321	0.811321	0.641509
YKL187C	FAT3	NEGATIVE	NEGATIVE	0.75	0.916667	0.666667	0.875	0.763889
YOR328W	PDR10	NUCLEAR	NUCLEAR	0.742616	1.08861	0.894515	1	0.607595
YPL057C	SUR1	INM	INM	0.736842	0.736842	0.824561	0.782895	0.644737
YOR306C	MCH5	NEGATIVE	NEGATIVE	0.733333	1.37778	1.37778	1.04444	2.22222
YMR251W-A	HOR7	NUCLEAR	NUCLEAR	0.733333	0.813333	0.819291	0.763972	0.888511
YPR027C	YPR027C	NEGATIVE	NEGATIVE	0.730769	1.15385	0.961538	1.30769	1.88462
YDR077W	SED1	NEGATIVE	NEGATIVE	0.728261	0.695652	1.13043	0.619565	0.793478
YNR070W	PDR18	NEGATIVE	NEGATIVE	0.724638	0.768116	1.15942	1	0.724638
YLR207W	HRD3	NEGATIVE	NEGATIVE	0.723618	0.768844	0.638191	0.693467	0.824121
YML047C	PRM6	NEGATIVE	NEGATIVE	0.721519	2.89873	1.53165	0.506329	1.49367
YDR343C	HXT6	INM	INM	0.72093	0.632558	0.702326	0.813953	0.4
YLR191W	PEX13	NEGATIVE	NEGATIVE	0.714286	1.2381	0.5	0.952381	0.714286
YKL217W	JEN1	NEGATIVE	NEGATIVE	0.712897	0.702984	1.12691	0.66023	0.620447
YLR153C	ACS2	NUCLEAR	NUCLEAR	0.694655	0.712595	1.00994	0.775253	0.770518
YLR077W	FMP25	NEGATIVE	NEGATIVE	0.692308	0.846154	0.615385	0.884615	0.807692
YNL300W	TOS6	NUCLEAR	NUCLEAR	0.692308	1.45055	0.747253	1.32967	0.642857
YOL137W	BSC6	INM	INM	0.689655	1.2069	0.87931	0.87931	1.65517
YCL002C	YCL002C	INM	INM	0.688889	1.73333	0.983333	0.75	2.04444
YLR284C	ECI1	NEGATIVE	NEGATIVE	0.6875	0.8125	1.09375	1	0.6875
YLR414C	PUN1	INM	INM	0.687117	1.06135	1.22086	0.484663	2.05521
YDL245C	HXT15	NEGATIVE	NEGATIVE	0.686275	0.882353	1.15686	1.45098	0.843137
YKL051W	SFK1	NEGATIVE	NEGATIVE	0.685579	ND	0.70922	0.673759	ND
YDL067C	COX9	NEGATIVE	NEGATIVE	0.682927	1.26829	1.39024	0.95122	1.41463
YKL220C	FRE2	NEGATIVE	NEGATIVE	0.679245	ND	1.24528	1.24528	ND
YMR054W	STV1	INM	INM	0.678571	1.71429	1.60714	0.607143	0.785714
YDL211C	YDL211C	INM	INM	0.673077	1.20513	0.980769	1.01923	0.711538
YDR402C	DIT2	NEGATIVE	NEGATIVE	0.673077	0.769231	0.846154	0.653846	0.634615
YOR390W	FEX1	NEGATIVE	NEGATIVE	0.672131	1.42077	ND	1.35519	1.37705
YKL034W	TUL1	NEGATIVE	NEGATIVE	0.667331	0.702523	0.721116	0.547809	0.653386
YOR256C	TRE2	NEGATIVE	NEGATIVE	0.653226	2.08065	2.37097	1.20968	1.8629
YDL130W	RPP1B	NEGATIVE	NEGATIVE	0.652904	1.067	0.71746	0.686494	1.00927
YNL326C	PFA3	INM	INM	0.652568	0.752266	0.634441	1.71752	1.45015
YOR394W	PAU21	NEGATIVE	NEGATIVE	0.648148	1.375	0.638889	0.569444	1.15278
YKL219W	COS9	NEGATIVE	NEGATIVE	0.637681	0.695652	0.797101	0.869565	5.02899
YOR104W	PIN2	INM	INM	0.637681	1.28986	0.942029	1.6087	1.98551
YGR178C	PBP1	NUCLEAR	NUCLEAR	0.637394	0.541076	0.603399	0.903683	ND
YOR030W	DFG16	NEGATIVE	NEGATIVE	0.633803	0.830986	0.507042	0.732394	0.422535
YOR348C	PUT4	NEGATIVE	NEGATIVE	0.633333	1.31667	0.977778	0.95	1.38333
YLL052C	AQY2	NEGATIVE	NEGATIVE	0.630435	0.847826	1.30435	0.565217	0.630435
YEL065W	SIT1	INM	INM	0.62963	0.839506	0.475309	0.62963	0.716049
YLR395C	COX8	NEGATIVE	NEGATIVE	0.617886	3.89024	1.26829	1.41463	ND
YPL210C	SRP72	NEGATIVE	NEGATIVE	0.614407	1.60169	0.915254	0.567797	0.567797
YGL104C	VPS73	NEGATIVE	NEGATIVE	0.612903	1.72043	1.35484	1.09677	1.54839
YOR383C	FIT3	NEGATIVE	NEGATIVE	0.612903	0.983871	1.1129	1.08065	1.08065
YOR010C	TIR2	NUCLEAR	NUCLEAR	0.609155	0.528169	0.528169	0.28169	0.46831
YOR378W	AMF1	NEGATIVE	NEGATIVE	0.604396	0.893773	0.736264	0.747253	0.857143
YOL075C	YOL075C	NEGATIVE	NEGATIVE	0.602273	0.590909	0.556818	0.715909	0.534091
YKR093W	PTR2	NEGATIVE	NEGATIVE	0.59633	0.908257	0.770642	0.862385	0.504587
YFL040W	YFL040W	NEGATIVE	NEGATIVE	0.595745	0.702128	1.14894	0.978723	0.765957
YDR338C	YDR338C	INM	INM	0.571429	0.571429	ND	0.612245	0.714286
YJR159W	SOR1	NEGATIVE	NEGATIVE	0.571429	1.95238	0.571429	3.30159	1.26984
YOR100C	CRC1	NEGATIVE	NEGATIVE	0.555556	ND	1.91667	0.666667	4.38889
YNL237W	YTP1	INM	INM	0.551813	0.547927	0.493523	0.481865	0.61658
YER150W	SPI1	NEGATIVE	NEGATIVE	0.551724	1.58621	0.862069	1	1.24138
YLR246W	ERF2	INM	INM	0.55	0.55	0.85	0.7	1.1
YLR087C	CSF1	NEGATIVE	NEGATIVE	0.548387	0.806452	1.67742	1.16129	0.903226
YOR067C	ALG8	INM	INM	0.546392	0.360825	1.04124	0.536082	1.10309
YLR237W	THI7	INM	INM	0.543759	0.556671	0.571019	0.892396	0.546628
YKL178C	STE3	INM	INM	0.543379	0.648402	0.52968	0.650685	0.618721
YOL105C	WSC3	NEGATIVE	NEGATIVE	0.517857	0.428571	0.714286	1.10714	0.660714
YKR100C	SKG1	NEGATIVE	NEGATIVE	0.512821	1.12821	0.923077	0.948718	0.74359
YJR160C	MPH3	NEGATIVE	NEGATIVE	0.5	1.27778	ND	1.125	2.70833
YOR034C	AKR2	NEGATIVE	NEGATIVE	0.484375	0.796875	1.32812	0.609375	0.640625
YDR387C	CIN10	NEGATIVE	NEGATIVE	0.479167	1.02083	0.8125	0.666667	0.791667
YMR231W	PEP5	NEGATIVE	NEGATIVE	0.457038	0.683044	0.491088	0.460695	0.630256
YNL142W	MEP2	INM	INM	0.435252	0.701439	0.874101	0.582734	0.615108
YPL221W	FLC1	NEGATIVE	NEGATIVE	0.433962	0.603774	0.792453	0.943396	1.01887
YLR411W	CTR3	NEGATIVE	NEGATIVE	0.418605	0.527132	0.821705	0.767442	0.604651
YOR153W	PDR5	NEGATIVE	NEGATIVE	0.405292	0.270195	0.289694	0.293872	0.362117
YKR105C	VBA5	NEGATIVE	NEGATIVE	0.375	0.645833	0.916667	0.666667	0.645833
YNR056C	BIO5	NEGATIVE	NEGATIVE	0.363636	ND	0.909091	0.511364	0.602273
YKL027W	TCD2	NEGATIVE	NEGATIVE	0.359781	0.227086	0.406293	0.263748	0.322845
YOL119C	MCH4	NEGATIVE	NEGATIVE	0.357143	0.457143	1.01786	1.51071	1.43214
YKL146W	AVT3	NEGATIVE	NEGATIVE	0.35514	0.373832	0.317757	0.448598	0.317757
YLR037C	PAU23	NEGATIVE	NEGATIVE	0.351351	ND	0.351351	ND	0.702703
YOR059C	LPL1	INM	INM	0.307692	0.820513	0.759615	0.375	0.913462
YIR041W	PAU15	NEGATIVE	NEGATIVE	0.266667	0.488889	1.11111	0.533333	1.24444
YMR034C	RCH1	NEGATIVE	NEGATIVE	0.264706	0.632353	0.926471	0.279412	1.07353
YLR396C	VPS33	NUCLEAR	NUCLEAR	0.244819	0.841321	0.624352	0.777202	0.825777
YLR134W	PDC5	NUCLEAR	NUCLEAR	0.244496	0.984164	0.349942	0.630359	0.921205
YJR158W	HXT16	NEGATIVE	NEGATIVE	0.208333	1.20833	0.395833	0.75	1.58333
YDR345C	HXT3	INM	INM	0.17377	0.672131	1.28525	0.0934426	0.221311
YIR034C	LYS1	NUCLEAR	NUCLEAR	0.1597	2.90005	ND	ND	1.89925
YMR088C	VBA1	INM	INM	0.13267	0.600332	0.595357	0.598673	0.814262
YJR075W	HOC1	NEGATIVE	NEGATIVE	0.125	0.421875	0.375	0.4375	0.34375
KEY:
ND = not determined
Localization in wild-type (WT) as determined by screen published in Smoyer et al 2016
Tir1* signal was observed in wild-type cells in this screen
Manual score based on visual inspection of automated ratios of 1.4 or higher in asi1∆
Ratios for each mutants as reported by automated analysis of signal
